# Supplementary material for: Early-Stage IM Treatment with the Host-Derived Immunostimu-Lant CPDI-02 Increases Curative Protection of Healthy Outbred Mice Against Subcutaneous Infection with CA-MRSA USA300
Source: Preprints.org preprint supplement (doi:10.20944/preprints202410.0290.v1), 2024-10-04
Supplement: Supplementary file 1 [file supplementary]

## **Early-stage IM treatment with the host-derived immunostimulant CPDI-02 increases curative protection of healthy outbred mice against subcutaneous infection with CA-MRSA USA300**

**Jason P. Stewart<sup>1</sup>, Caleb M. Sandall<sup>1</sup>, Jacob E. Parriott<sup>1</sup>, Stephen M. Curran<sup>1</sup>, Russell J. McCulloh<sup>2,3</sup>, Donald R. Ronning<sup>1</sup>, Joy A. Phillips<sup>4</sup>, Robin Schroeder<sup>5</sup>, Christy Neel<sup>5</sup>, Kelly F. Lechtenberg<sup>5</sup>, Samuel M. Cohen<sup>6</sup>, Yazen Alnouti<sup>1</sup>, Sohel Daria<sup>1</sup>, D. David Smith<sup>7,\*</sup>, and Joseph A. Vetro<sup>1,8,\*</sup>**

<sup>1</sup> Department of Pharmaceutical Sciences, College of Pharmacy, University of Nebraska Medical Center, Omaha, NE 68198, USA; yezhen1@gmail.com (J.P.S.); caleb.sandall@unmc.edu (C.M.S.); smcurran@unmc.edu (S.M.C.); don.ronning@unmc.edu (D.R.R.); yalnouti@unmc.edu (Y.A.); sdaria@unmc.edu (S.D.)

<sup>2</sup> Department of Pediatrics, University of Nebraska Medical Center, Omaha, NE 68198, USA; russell.mcculloh@unmc.edu

<sup>3</sup> Division of Hospital Medicine, Children's Nebraska, Omaha, Nebraska

<sup>4</sup> San Diego State University, San Diego, California 92182, USA; jphillips@sdsu.edu

<sup>5</sup> Midwest Veterinary Services, Inc., Oakland, NE 68045, USA.; kelly@mvsinc.net

<sup>6</sup> Department of Pathology and Microbiology, University of Nebraska Medical Center, Omaha, NE, USA; scohen@unmc.edu

<sup>7</sup> Department of Biomedical Sciences, Creighton University, Omaha, Nebraska 68178, USA

<sup>8</sup> Center for Drug Delivery and Nanomedicine, University of Nebraska Medical Center, Omaha, NE 68198, USA

\* Correspondence: dsmith@creighton.edu; jvetro@unmc.edu; Tel.: +1-402.280.1898 (D.D.S.); +1-402-559-9359 (J.A.V)

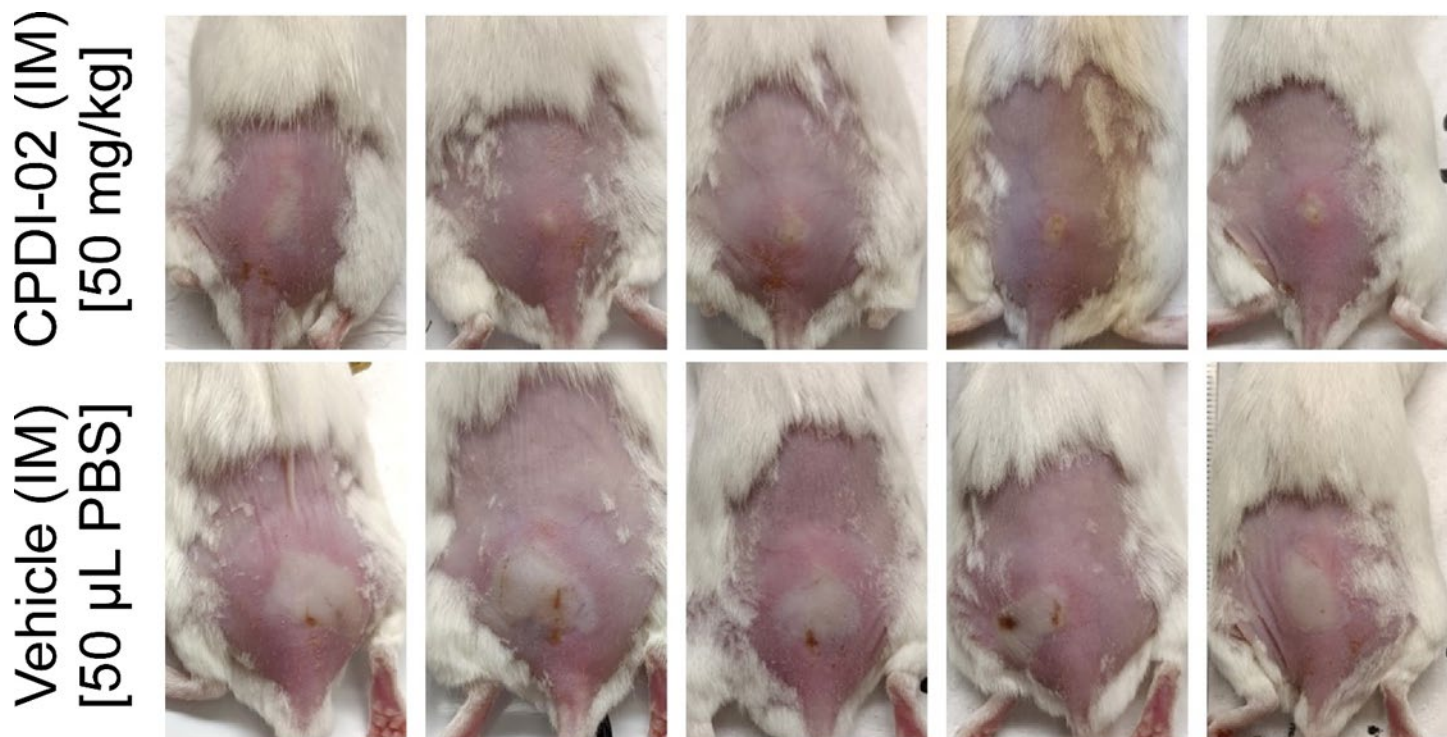

**Figure S1.** Representative images of dermal abscesses on the rear dorsal region of CPDI-02-treated and untreated healthy female outbred mice 24 hours after subcutaneous challenge with CA-MRSA. On Day 0, community-acquired methicillin-resistant *Staphylococcus aureus* (CA-MRSA, USA300 strain,  $5 \times 10^7$  CFU) was administered SQ (0.1 mL sterile PBS) from the left rear flank into the dorsal side of 4 to 6-week-old healthy female outbred CD-1 mice (Figs.2&3). At 6 hours post-challenge, vehicle alone (sterile PBS, 50  $\mu$ L) or vehicle containing CPDI-02 [50 mg/kg] was administered in the caudal thigh muscle and abscess surface areas (n=10 mice per cohort; 5 representative mice shown) were determined 24 hours post-challenge by image analysis.

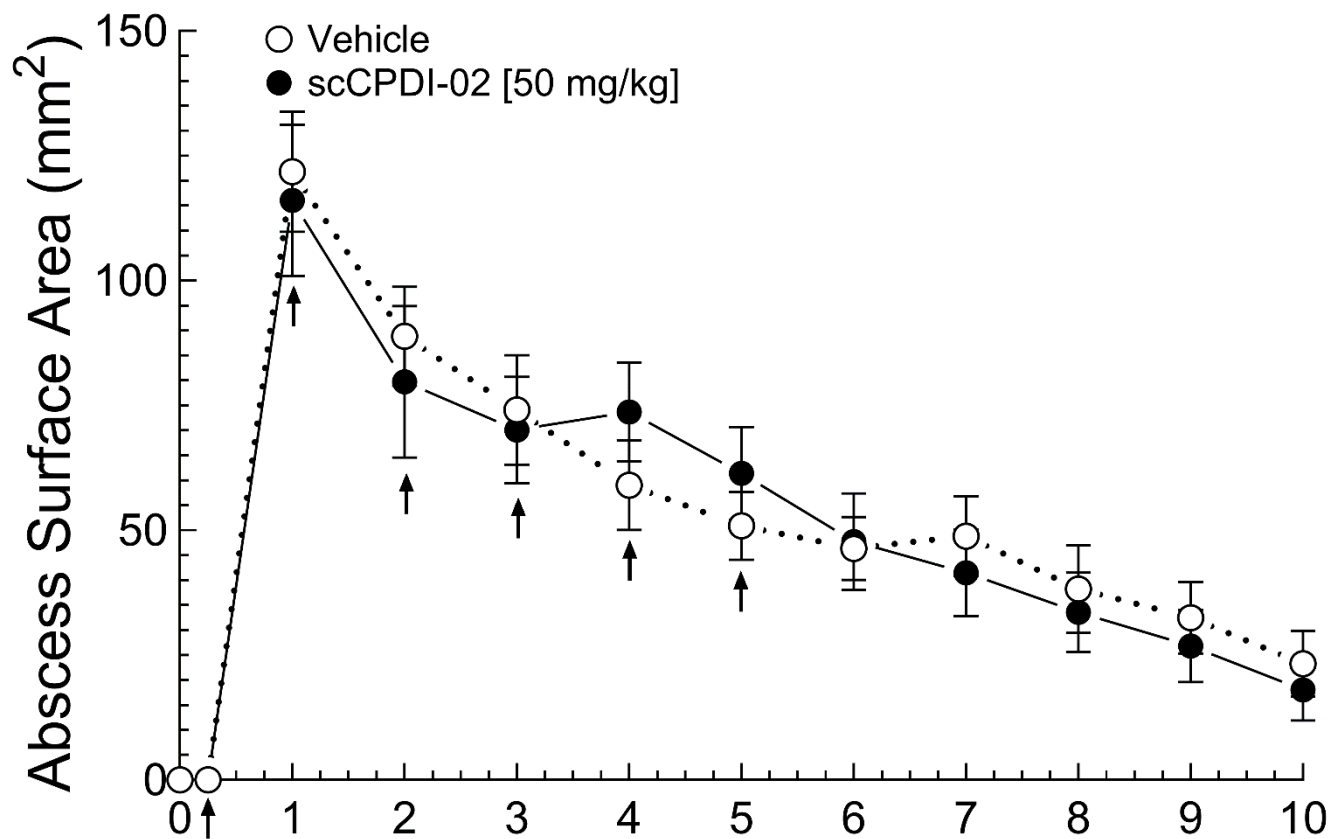

**Figure S2.** Repeat IM treatment with inactive, scrambled CPDI-02 does not increase curative protection of healthy female outbred mice against subcutaneous challenge with CA-MRSA. On Day 0, community-acquired methicillin-resistant *Staphylococcus aureus* (CA-MRSA, USA300 strain,  $5 \times 10^7$  CFU) was administered SQ (0.1 mL sterile PBS) from the rear left flank into the dorsal side of 6-week-old female outbred CD-1 mice (**Fig.2**). At 6 hours post-challenge ( $\uparrow$ ), vehicle alone (50  $\mu$ L sterile PBS, black circles) or vehicle containing 50 mg/kg inactive, scrambled CPDI-02 (scCPDI-02, white circles) was administered IM (caudal thigh muscle). Average dermal abscess surface areas  $\pm$  SEM (n=10 mice) were determined daily starting 24 hours post-challenge by quantitative image analysis and compared between doses by repeated measurement 2-Way ANOVA with Geisser-Greenhouse correction and Tukey post-test

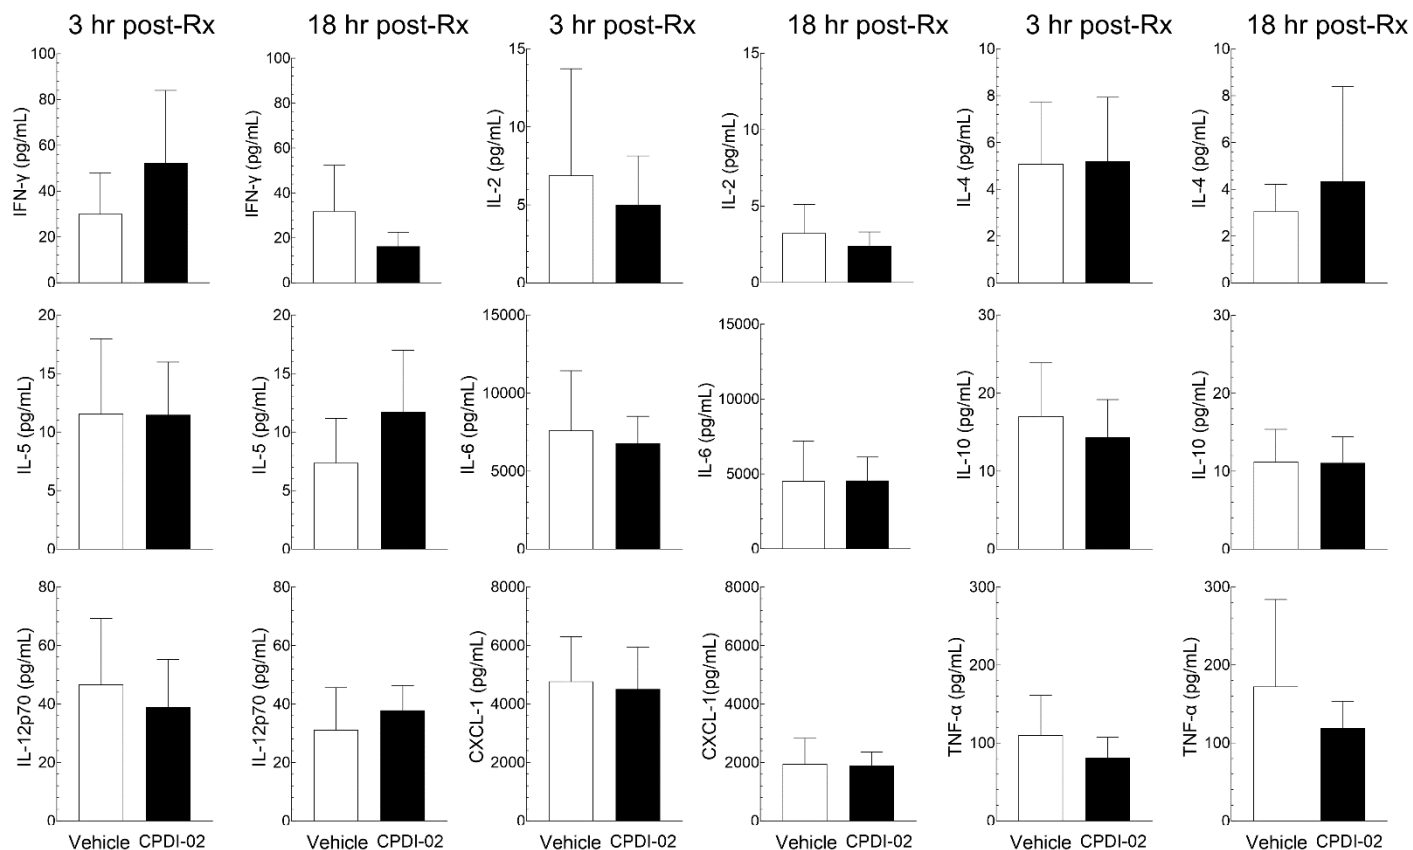

**Figure S3.** Single curative IM treatment with CPDI-02 does not affect early levels of many cytokines and chemokines potentially involved in the inflammation of dermal abscesses after subcutaneous infection of healthy female outbred mice with CA-MRSA. On Day 0, community-acquired methicillin-resistant *Staphylococcus aureus* (CA-MRSA, USA300 strain,  $5 \times 10^7$  CFU) was administered SQ (0.1 mL sterile PBS) from the left rear flank into the dorsal side of 6-week-old female outbred CD-1 mice. At 6 hours post-challenge, vehicle alone (white bars, sterile PBS, 50  $\mu$ L) or vehicle containing CPDI-02 at 50 mg/kg (black symbols) was administered IM to the left caudal thigh muscle. Average concentrations of pro-inflammatory markers  $\pm$ SD (n=5 mice per time point) in dermal abscesses at (A) 3 hours post-treatment (9 hours post-challenge) or (B) 18 hours post-treatment (24 hours post-challenge) were then determined by multiplex ELISA and compared by two-tailed t test with Mann-Whitney post-test (P value shown)

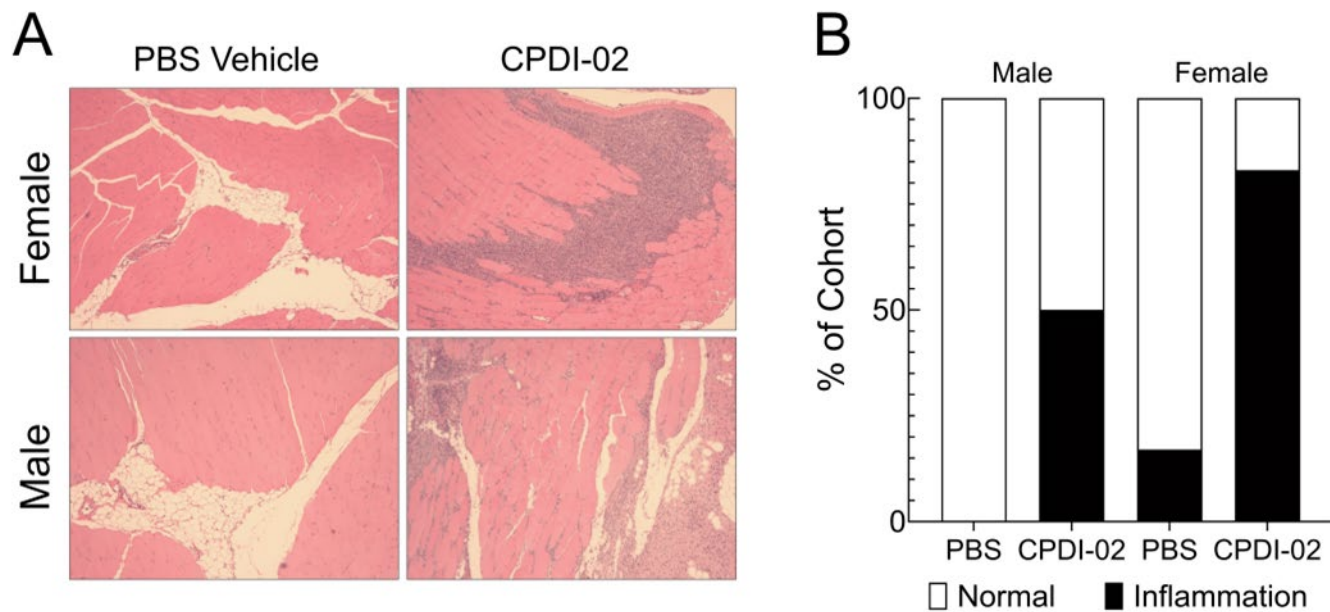

**Figure S4.** Histological comparison of inflammation around the injection site in caudal thigh muscles from healthy male and female outbred mice after IM dose escalation of CPDI-02. Vehicle alone (endotoxin-free PBS) or vehicle containing increasing doses of CPDI-02 was injected biweekly into the (left) caudal thigh muscle of healthy male and female outbred CD-1 mice over 28 days (**Fig.6**). Four days after the final injection, inflammation around the injection site was assessed by (**A**) histochemistry (HC) with H&E staining (4X magnification) and (**B**) proportion of each cohort with signs of inflammation was determined. HC images are representative of 10 mice from each treatment group

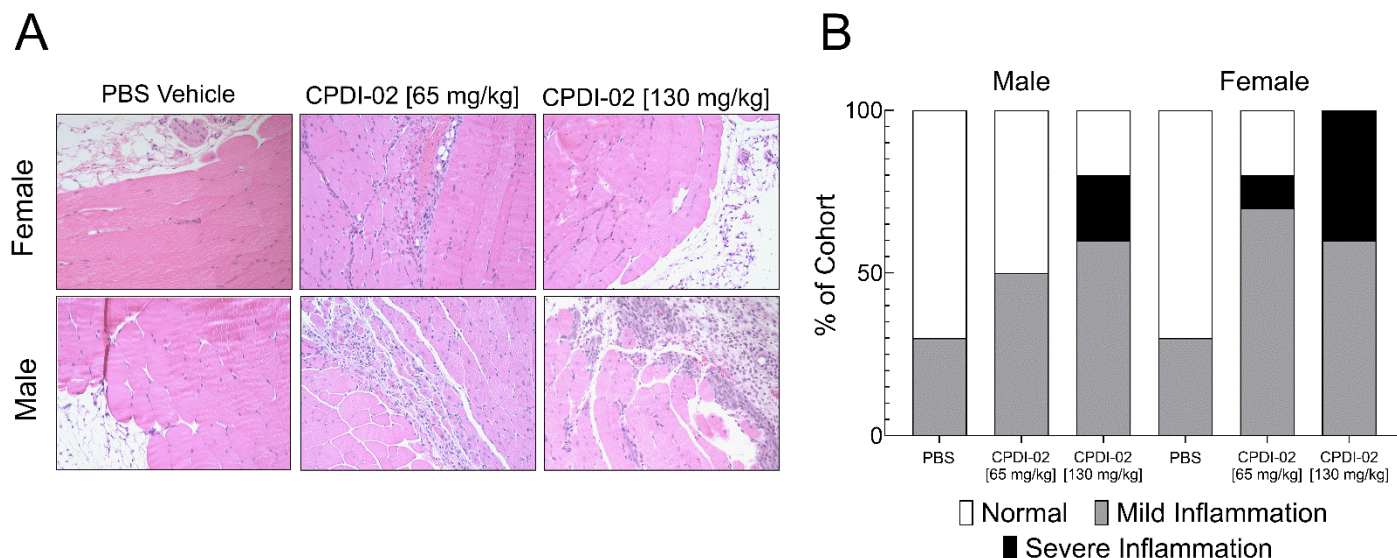

**Figure S5.** Histological comparison of inflammation around the injection site in caudal thigh muscles from male and female outbred mice after repeat IM dosing of CPDI-02. (Are there histological slides for 130 mg CPDI-02/kg in female CD-1 mice that show more evidence of inflammation as observed for male mice?) Vehicle alone (endotoxin-free PBS) or vehicle containing CPDI-02 (65 mg/kg or 130 mg/kg) was injected biweekly into the left caudal thigh muscle of healthy male and female outbred CD-1 mice over 28 days (**Fig.7**). Four days after the final injection, signs of inflammation around the injection site were assessed by (**A**) histochemistry (HC) with H&E staining (4X magnification) to determine (**B**) proportions of each cohort with signs of mild to severe inflammation. HC images are representative of 10 mice from each treatment group.

**Table S1 Pain and Distress Scoring in Mice**

| <b>Score</b> | <b>Pain</b>                           | <b>Examples</b>                                                                                                                                                                                             |
|--------------|---------------------------------------|-------------------------------------------------------------------------------------------------------------------------------------------------------------------------------------------------------------|
| 1            | No indication of pain or distress     | Normal; well groomed; alert; active; good condition; asleep or calm; normal appetite                                                                                                                        |
| 2            | Mild or anticipated pain and distress | Not well groomed; awkward gait; slightly hunched; looks at injection site or pulls away when area is touched; mildly agitated                                                                               |
| 3            | Moderate pain and distress            | Rough hair coat; dirty incision; squinted eyes; moves slowly; walks hunched and/or slowly; depressed or moderately agitated; slight dehydration; pruritic; restless; uncomfortable; not eating or drinking. |
| 4            | Severe pain and distress              | Very rough hair coat; eyes sunken (severe dehydration); slow to move or non-responsive when coaxed; hunched; large abdominal mass; dyspnea; self-mutilating; violent reaction to stimuli or when approached |

**Table S2 Complete Blood Count with Differential 4 Days after IM Dose Escalation of CPDI-02 in Healthy Male and Female Outbred CD-1 Mice**

| Analyte          | Unit ( $\pm$ SD)          | PBS (M)         | PBS (F)         | CPDI-02 (M)     | CPDI-02 (F)     |
|------------------|---------------------------|-----------------|-----------------|-----------------|-----------------|
| RBC Count        | $\times 10^3/\mu\text{L}$ | $10 \pm 2$      | $10 \pm 2$      | $9 \pm 1$       | $9 \pm 2$       |
| Hematocrit       | %                         | $52 \pm 11$     | $53 \pm 10$     | $45 \pm 7$      | $44 \pm 9$      |
| MCV              | fL                        | $50 \pm 3$      | $54 \pm 4$      | $51 \pm 3$      | $51 \pm 4$      |
| MCH              | pg                        | $15 \pm 1$      | $15 \pm 2$      | $15.4 \pm 0.5$  | $14.3 \pm 0.5$  |
| MCHC             | g/dL                      | $29 \pm 3$      | $27 \pm 2$      | $30 \pm 2$      | $28 \pm 2$      |
| RDW              | %                         | $18.4 \pm 0.9$  | $19.1 \pm 0.8$  | $17.8 \pm 0.5$  | $18.6 \pm 0.6$  |
| Hemoglobin       | g/dL                      | $15 \pm 3$      | $14 \pm 3$      | $13 \pm 2$      | $12 \pm 3$      |
| Platelet Count   | $\times 10^3/\mu\text{L}$ | $320 \pm 150$   | $223 \pm 93$    | $135 \pm 100$   | $106 \pm 66$    |
| PCT              | %                         | $0.2 \pm 0.1$   | $0.16 \pm 0.07$ | $0.11 \pm 0.06$ | $0.08 \pm 0.06$ |
| MPV              | fL                        | $7.1 \pm 0.8$   | $7.4 \pm 0.5$   | $7 \pm 1$       | $7 \pm 2$       |
| PDW              | fL                        | $11 \pm 3$      | $11 \pm 3$      | $11 \pm 4$      | $10 \pm 2$      |
| WBC Count        | $\times 10^3/\mu\text{L}$ | $2.7 \pm 0.8$   | $3.4 \pm 0.7$   | $4 \pm 1$       | $3 \pm 2$       |
| Neutrophil Count | $\times 10^3/\mu\text{L}$ | $0.5 \pm 0.3$   | $0.5 \pm 0.4$   | $0.5 \pm 0.5$   | $0.2 \pm 0.1$   |
| Neutrophils      | %                         | $16 \pm 6$      | $14 \pm 10$     | $15 \pm 10$     | $10 \pm 6$      |
| Monocyte Count   | $\times 10^3/\mu\text{L}$ | $0.11 \pm 0.05$ | $0.2 \pm 0.1$   | $0.2 \pm 0.1$   | $0.13 \pm 0.07$ |
| Monocytes        | %                         | $3.9 \pm 0.7$   | $6 \pm 4$       | $4 \pm 2$       | $5 \pm 4$       |
| Lymphocyte Count | $\times 10^3/\mu\text{L}$ | $2.1 \pm 0.5$   | $2.7 \pm 0.5$   | $3.1 \pm 0.7$   | $2 \pm 2$       |
| Lymphocytes      | %                         | $80 \pm 6$      | $80 \pm 13$     | $80 \pm 11$     | $85 \pm 9$      |

Complete blood cell count (CBC) with differential was determined four days after the final injection. (F) – female CD-1 mice; (M) – male CD-1 mice; MCV – mean corpuscular volume; MCH – mean corpuscular hemoglobin; MCHC – mean corpuscular hemoglobin concentration; RDW – red cell distribution width; PCT – plateletcrit; MPV – mean platelet volume; PDW – platelet distribution width; WBC – white blood cell.



**Table S3 Complete Blood Count with Differential 4 Days after Repeat IM Dosing of CPDI-02 in Healthy Male and Female Outbred CD-1 Mice**

| Analyte          | Unit (±SD)           | PBS (M)     | PBS (F)     | CPDI-02<br>65 mg/kg (M) | CPDI-02<br>65 mg/kg (F) | CPDI-02<br>130 mg/kg (M) | CPDI-02<br>130 mg/kg (F) |
|------------------|----------------------|-------------|-------------|-------------------------|-------------------------|--------------------------|--------------------------|
| RBC Count        | ×10 <sup>3</sup> /μL | 9.9 ± 0.9   | 9 ± 3       | 10 ± 1                  | 10 ± 3                  | 11 ± 2                   | 10 ± 2                   |
| Hematocrit       | %                    | 54 ± 6      | 46 ± 15     | 54 ± 7                  | 54 ± 17                 | 61 ± 12                  | 55 ± 9                   |
| MCV              | fL                   | 55 ± 2      | 48 ± 1      | 55 ± 2                  | 52 ± 2                  | 54 ± 1                   | 54 ± 2                   |
| MCH              | pg                   | 15.7 ± 0.6  | 14 ± 4      | 15.7 ± 0.5              | 15.6 ± 0.7              | 15.3 ± 0.4               | 16 ± 1                   |
| MCHC             | g/dL                 | 28.5 ± 0.9  | 30 ± 8      | 28 ± 1                  | 30 ± 2                  | 28.1 ± 0.9               | 29 ± 1                   |
| RDW              | %                    | 23 ± 1      | 21 ± 2      | 23 ± 1                  | 24 ± 3                  | 25 ± 2                   | 24 ± 2                   |
| Hemoglobin       | g/dL                 | 15 ± 1      | 16 ± 5      | 15 ± 2                  | 16 ± 4                  | 17 ± 3                   | 16 ± 2                   |
| Platelet Count   | ×10 <sup>3</sup> /μL | 636 ± 188   | 759 ± 196   | 636 ± 146               | 659 ± 237               | 689 ± 170                | 857 ± 198                |
| PCT              | %                    | 0.5 ± 0.1   | 0.6 ± 0.2   | 0.5 ± 0.1               | 0.5 ± 0.2               | 0.5 ± 0.1                | 0.7 ± 0.2                |
| MPV              | fL                   | 7.8 ± 0.3   | 8.3 ± 0.3   | 7.7 ± 0.6               | 7.6 ± 0.6               | 7.7 ± 0.3                | 7.8 ± 0.3                |
| PDW              | fL                   | 7.4 ± 0.3   | 7.3 ± 0.3   | 7.6 ± 0.6               | 7.8 ± 0.9               | 8.2 ± 0.7                | 7.4 ± 0.5                |
| WBC Count        | ×10 <sup>3</sup> /μL | 7 ± 2       | 7 ± 3       | 6 ± 2                   | 7 ± 2                   | 6 ± 2                    | 8 ± 3                    |
| Neutrophil Count | ×10 <sup>3</sup> /μL | 2.6 ± 0.8   | 1.3 ± 0.7   | 2.6 ± 0.8               | 3 ± 1                   | 2 ± 1                    | 3 ± 1                    |
| Neutrophils      | %                    | 37 ± 5      | 20 ± 5      | 41 ± 10                 | 30 ± 18                 | 45 ± 17                  | 33 ± 8                   |
| Monocyte Count   | ×10 <sup>3</sup> /μL | 0.03 ± 0.01 | 0.02 ± 0.01 | 0.03 ± 0.01             | 0.02 ± 0.01             | 0.02 ± 0.02              | 0.03 ± 0.01              |
| Monocytes        | %                    | 0.4 ± 0.2   | 0.2 ± 0.1   | 0.4 ± 0.2               | 0.3 ± 0.2               | 0.4 ± 0.2                | 0.3 ± 0.1                |
| Lymphocyte Count | ×10 <sup>3</sup> /μL | 4 ± 1       | 5 ± 2       | 4 ± 1                   | 5 ± 1                   | 3 ± 2                    | 5 ± 2                    |
| Lymphocytes      | %                    | 60 ± 6      | 77 ± 5      | 55 ± 11                 | 62 ± 12                 | 51 ± 17                  | 63 ± 7                   |

Complete blood cell count (CBC) with differential was determined four days after the final injection. (F) – female CD-1 mice; (M) – male CD-1 mice; MCV – mean corpuscular volume; MCH – mean corpuscular hemoglobin; MCHC – mean corpuscular hemoglobin concentration; RDW – red cell distribution width; PCT – plateletcrit; MPV – mean platelet volume; PDW – platelet distribution width; WBC – white blood cell.

**Table S4 Blood Chemistry 4 Days after Repeat IM Dosing of CPDI-02 in Healthy Male and Female Outbred CD-1 Mice**

| Analyte | Unit (±SD) | PBS (M)    | PBS (F)     | CPDI-02<br>65 mg/kg (M) | CPDI-02<br>65 mg/kg (F) | CPDI-02<br>130 mg/kg (M) | CPDI-02<br>130 mg/kg (F) |
|---------|------------|------------|-------------|-------------------------|-------------------------|--------------------------|--------------------------|
| ALB     | g/L        | 41 ± 2     | 42 ± 3      | 39 ± 2                  | 41.1 ± 0.7              | 40 ± 2                   | 41 ± 2                   |
| ALP     | U/L        | 71 ± 22    | 86 ± 19     | 66 ± 18                 | 74 ± 28                 | 61 ± 13                  | 77 ± 49                  |
| ALT     | U/L        | 132 ± 285  | 136 ± 153   | 41 ± 24                 | 39 ± 19                 | 100 ± 134                | 200 ± 257                |
| AMY     | U/L        | 1005 ± 440 | 1199 ± 988  | 1032 ± 582              | 734 ± 169               | 867 ± 138                | 659 ± 62                 |
| TBIL    | µM         | 4.1 ± 0.8  | 4.1 ± 0.8   | 4 ± 1                   | 6 ± 1                   | 4 ± 1                    | 4.4 ± 0.8                |
| BUN     | mM         | 12 ± 1     | 10 ± 2      | 11 ± 1                  | 10 ± 1                  | 11 ± 1                   | 9 ± 2                    |
| CA      | mM         | 2.5 ± 0.1  | 2.31 ± 0.05 | 2.5 ± 0.2               | 2.4 ± 0.1               | 2.46 ± 0.07              | 2.3 ± 0.1                |
| PHOS    | mM         | 1.9 ± 0.4  | 3 ± 1       | 2.4 ± 0.5               | 2.6 ± 0.9               | 2.2 ± 0.4                | 2.7 ± 0.7                |
| GLU     | mM         | 15 ± 3     | 13 ± 4      | 17 ± 2                  | 15 ± 3                  | 13 ± 5                   | 14 ± 4                   |
| Na      | mM         | 151 ± 6    | 148 ± 3     | 152 ± 7                 | 148 ± 4                 | 147 ± 2                  | 146 ± 2                  |
| K       | mM         | 5 ± 1      | 5 ± 1       | 5 ± 1                   | 4.1 ± 0.3               | 5.6 ± 0.8                | 5 ± 1                    |
| TP      | g/L        | 51 ± 3     | 49 ± 4      | 50 ± 2                  | 51 ± 4                  | 50 ± 1                   | 49 ± 3                   |
| GLOB    | g/L        | 10 ± 2     | 7 ± 2       | 11 ± 2                  | 9 ± 3                   | 11 ± 1                   | 7 ± 2                    |

Average analyte concentration ±SD (n=7 to 10 mice) was determined four days after the final injection and treatment groups were compared within each sex by Kruskal-Wallis test. (F) – female CD-1 mice; (M) – male CD-1 mice; ALB – albumin (kidney/liver); ALP – alkaline phosphatase (liver/bone); ALT – alanine transaminase (liver); AMY – amylase (pancreas); TBIL – bilirubin (liver); BUN – blood urea nitrogen (kidneys); CA – calcium (bone/thyroid/parathyroid/kidneys); PHOS – phosphate (kidney/bone/parathyroid); GLU – glucose (pancreas); Na – sodium; K – potassium; TP – total protein (liver/kidney); GLOB – globulin (liver/kidney).
